# Supplementary material
Source: publisher site journal article supplement (https://www.dovepress.com/article/305020)
Supplement: Supplementary file 1 [file get_supplementary_file.php]

**Table S1 Results of SNP and Sample filtering**

|  | Glibenclamide  monotherapy group | Combination  treatment group | | Metformin  monotherapy group |
| --- | --- | --- | --- | --- |
| iSelect chip | iSelect chip | GoldenGate  Chip | GoldenGate  Chip |
| SNP filtering |  |  |  |  |
| Call rate≥90% (n, %) | 2932(98.19) | 2932(98.19) | 708(92.19) | 710(92.45) |
| MAF≥0.05 (n, %) | 612(20.50) | 648(21.70) | 718(93.49) | 721(93.88) |
| HWE *P* value>0.05 (n, %) | 2913(97.56) | 2890(96.79) | 720(93.75) | 715(93.10) |
| Sample filtering |  |  |  |  |
| Call Rate≥90% (n, %) | 181(100) | 176(100) | 173a (99.43) | 143(100.00) |
| SNPs for association analysis | 545 | 551 | 645 | 644 |

a Two of 176 patients didn’t undergo GoldenGate Chip so that the number of genotyping individuals was 174 in total.


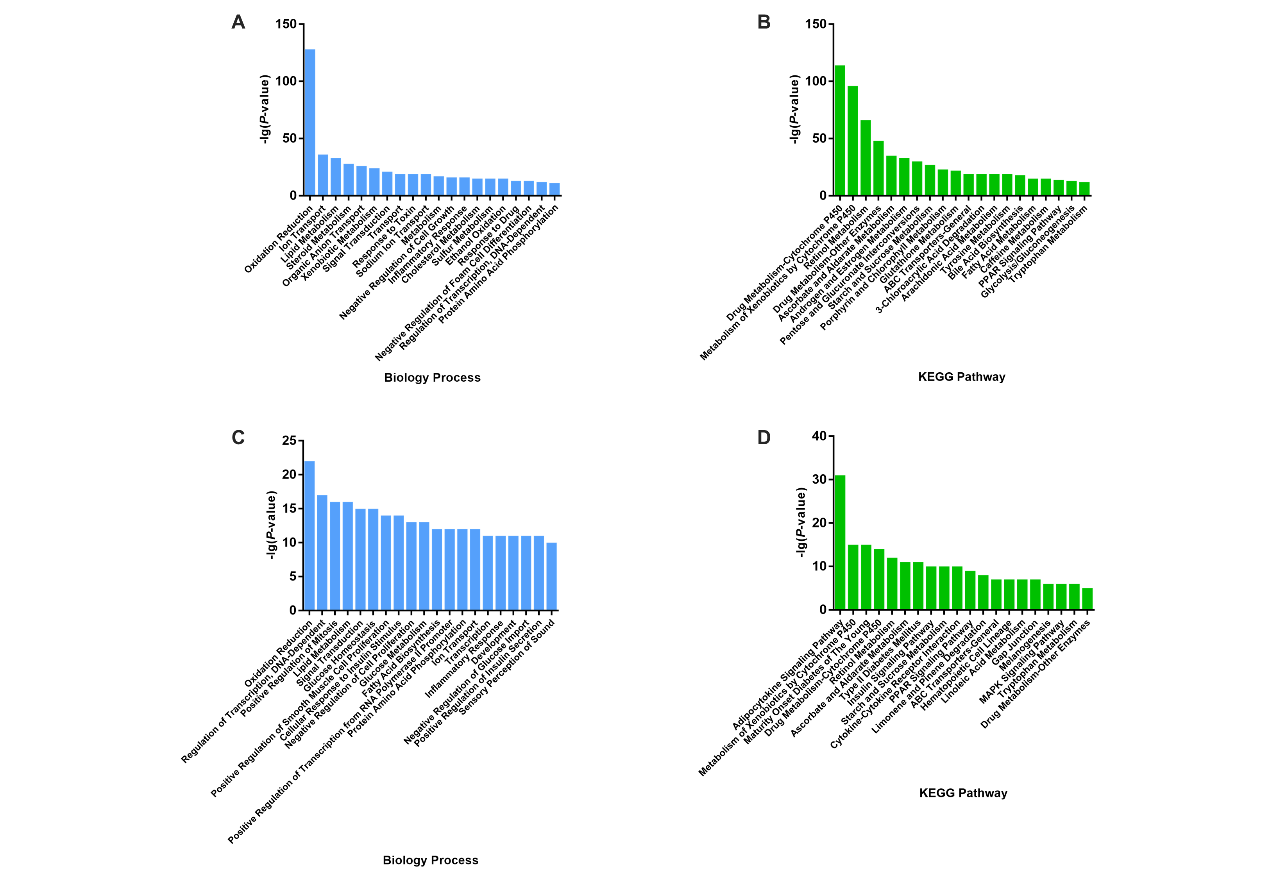


**Figure S1** The 20 top-ranked GO (Gene Ontology) biological process and KEGG (Kyoto Encyclopedia of Genes and Genomes) Pathway analysis of SNPs customed in genotyping chips. A: The top 20 gene sets in GO analysis of iSelect genotyping chip; B: The top 20 gene sets in KEGG pathway analysis of iSelect genotyping chip; C: The top 20 gene sets in GO analysis of GoldenGate genotyping chip; D: The top 20 gene sets in KEGG pathway analysis of GoldenGate genotyping chip.
